# Supplementary material
Source: Springer Nature journal article supplement (https://www.springermedizin.de/resource/supplementary/13012_2011_441_MOESM4_ESM.pdf/9630126)
Supplement: MOESM4 [file 9630126]

Pre-diabetes Action Plan Smartset

Diagnosis

Diagnosis

1 of 1 selected

Pre-diabetes [edit](#)

Labs

Labs

HEMOGLOBIN A1C  
 Today, Normal

HEMOGLOBIN A1C (POCT)  
Today, Point of Care Testing

Preserved Glucose  
 Routine, Normal

Lipid Panel  
 Routine, Normal

Documentation

Progress Notes

ADAPT Checklist only [edit](#)  
 Complete Progress Note

Behavioral Rx

Behavioral Rx (Supportive Therapy)

1 of 1 selected

ADAPT pre-diabetes goals set during visit  
 Today, Normal

Follow-Up

Patient Instructions

1 of 1 selected

ADAPT STUDY Patient Instructions [edit](#)

 Associate Primary Dx New Dx Providers

 Pharmacy

[Next](#)

[Pend](#) [Sign](#) [Remove](#)

[Restore](#) [Close](#) F9

[Previous](#) F7 [Next](#) F
